# Supplementary material
Source: MDPI journal article supplement (https://www.mdpi.com/2304-6740/7/4/48)

# checkCIF/PLATON report

Structure factors have been supplied for datablock(s) shelx

THIS REPORT IS FOR GUIDANCE ONLY. IF USED AS PART OF A REVIEW PROCEDURE FOR PUBLICATION, IT SHOULD NOT REPLACE THE EXPERTISE OF AN EXPERIENCED CRYSTALLOGRAPHIC REFEREE.

No syntax errors found.      CIF dictionary      Interpreting this report

## Datablock: shelx

---

Bond precision:    C-C = 0.0136 Å

Wavelength=0.71073

Cell:                a=8.300(1)                b=16.191(2)                c=21.221(3)  
                      alpha=108.167(4)        beta=94.071(5)        gamma=104.453(4)  
Temperature:    100 K

|                | Calculated            | Reported       |
|----------------|-----------------------|----------------|
| Volume         | 2589.3(6)             | 2589.5(6)      |
| Space group    | P -1                  | P -1           |
| Hall group     | -P 1                  | -P 1           |
| Moiety formula | C11 H20 N4, 2(I3), I2 | ?              |
| Sum formula    | C11 H20 I8 N4         | C22 H40 I16 N8 |
| Mr             | 1223.51               | 2447.02        |
| Dx,g cm-3      | 3.139                 | 3.138          |
| Z              | 4                     | 2              |
| Mu (mm-1)      | 9.587                 | 9.586          |
| F000           | 2152.0                | 2152.0         |
| F000'          | 2137.75               |                |
| h,k,lmax       | 9,19,25               | 9,19,25        |
| Nref           | 9458                  | 9410           |
| Tmin,Tmax      | 0.115,0.563           | 0.377,0.747    |
| Tmin'          | 0.049                 |                |

Correction method= # Reported T Limits: Tmin=0.377 Tmax=0.747  
AbsCorr = MULTI-SCAN

Data completeness= 0.995

Theta(max)= 25.350

R(reflections)= 0.0377( 8865)

wR2(reflections)= 0.1083( 9410)

S = 1.018

Npar= 415

---



PLAT434\_ALERT\_2\_A Short Inter HL..HL Contact I3 ..I12 3.25 Ang.  
x,y,z = 1\_555 Check

**Author Response:** these are long intramolecular distances featuring the I5-polyiodide or short I...I secondary bonds. All these distances are discussed in the manuser

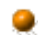

PLAT434\_ALERT\_2\_B Short Inter HL..HL Contact I4 ..I13 3.39 Ang.  
1-x,1-y,-z = 2 665 Check

**Author Response:** these are long intramolecular distances featuring the I5-polyiodide or short I...I secondary bonds. All these distances are discussed in the manuscript

PLAT434\_ALERT\_2\_B Short Inter HL..HL Contact I5            ..I16                 3.40 Ang.  
x,y,z =            1 555 Check

**Author Response:** these are long intramolecular distances featuring the I5-polyiodide or short I...I secondary bonds. All these distances are discussed in the manuscript

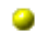

```

DIFMN02_ALERT_2_C The minimum difference density is < -0.1*ZMAX*0.75
_refine_diff_density_min given = -4.595
Test value = -3.975
DIFMN03_ALERT_1_C The minimum difference density is < -0.1*ZMAX*0.75
The relevant atom site should be identified.
PLAT098_ALERT_2_C Large Reported Min. (Negative) Residual Density -4.59 eA-3
PLAT213_ALERT_2_C Atom C11 has ADP max/min Ratio ..... 3.5 prolat
PLAT241_ALERT_2_C High 'MainMol' Ueq as Compared to Neighbors of C6 Check
PLAT241_ALERT_2_C High 'MainMol' Ueq as Compared to Neighbors of C11 Check
PLAT242_ALERT_2_C Low 'MainMol' Ueq as Compared to Neighbors of N4 Check
PLAT342_ALERT_3_C Low Bond Precision on C-C Bonds ..... 0.01362 Ang.
PLAT420_ALERT_2_C D-H Without Acceptor N3 --H3A . Please Check
PLAT420_ALERT_2_C D-H Without Acceptor N7 --H7A . Please Check
PLAT790_ALERT_4_C Centre of Gravity not Within Unit Cell: Resd. # 1 Note
C11 H20 N4

```

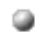

|                   |                                                  |      |        |
|-------------------|--------------------------------------------------|------|--------|
| PLAT003_ALERT_2_G | Number of Uiso or Uij Restrained non-H Atoms ... | 3    | Report |
| PLAT007_ALERT_5_G | Number of Unrefined Donor-H Atoms .....          | 10   | Report |
| PLAT045_ALERT_1_G | Calculated and Reported Z Differ by a Factor ... | 2.00 | Check  |

|                                                                    |                 |             |
|--------------------------------------------------------------------|-----------------|-------------|
| PLAT083_ALERT_2_G SHELXL Second Parameter in WGHT                  | Unusually Large | 27.23 Why ? |
| PLAT186_ALERT_4_G The CIF-Embedded .res File Contains ISOR Records |                 | 1 Report    |
| PLAT434_ALERT_2_G Short Inter HL..HL Contact I8                    | ..I14           | 3.59 Ang.   |
|                                                                    | 1+x,y,z =       | 1_655 Check |

**Author Response: these are long intramolecular distances featuring the I5-polyiodide or short I...I secondary bonds. All these distances are discussed in the manuscript**

|                                                  |             |             |
|--------------------------------------------------|-------------|-------------|
| PLAT434_ALERT_2_G Short Inter HL..HL Contact I10 | ..I11       | 3.52 Ang.   |
|                                                  | -x,1-y,-z = | 2_565 Check |

**Author Response: these are long intramolecular distances featuring the I5-polyiodide or short I...I secondary bonds. All these distances are discussed in the manuscript**

|                                                                    |         |
|--------------------------------------------------------------------|---------|
| PLAT790_ALERT_4_G Centre of Gravity not Within Unit Cell: Resd. #  | 2 Note  |
| C11 H20 N4                                                         |         |
| PLAT790_ALERT_4_G Centre of Gravity not Within Unit Cell: Resd. #  | 4 Note  |
| I3                                                                 |         |
| PLAT790_ALERT_4_G Centre of Gravity not Within Unit Cell: Resd. #  | 7 Note  |
| I2                                                                 |         |
| PLAT790_ALERT_4_G Centre of Gravity not Within Unit Cell: Resd. #  | 9 Note  |
| I2                                                                 |         |
| PLAT802_ALERT_4_G CIF Input Record(s) with more than 80 Characters | 1 Info  |
| PLAT860_ALERT_3_G Number of Least-Squares Restraints .....         | 18 Note |

- 
- 1 **ALERT level A** = Most likely a serious problem - resolve or explain
  - 2 **ALERT level B** = A potentially serious problem, consider carefully
  - 11 **ALERT level C** = Check. Ensure it is not caused by an omission or oversight
  - 13 **ALERT level G** = General information/check it is not something unexpected
  
  - 2 ALERT type 1 CIF construction/syntax error, inconsistent or missing data
  - 15 ALERT type 2 Indicator that the structure model may be wrong or deficient
  - 2 ALERT type 3 Indicator that the structure quality may be low
  - 7 ALERT type 4 Improvement, methodology, query or suggestion
  - 1 ALERT type 5 Informative message, check
- 
-

It is advisable to attempt to resolve as many as possible of the alerts in all categories. Often the minor alerts point to easily fixed oversights, errors and omissions in your CIF or refinement strategy, so attention to these fine details can be worthwhile. In order to resolve some of the more serious problems it may be necessary to carry out additional measurements or structure refinements. However, the purpose of your study may justify the reported deviations and the more serious of these should normally be commented upon in the discussion or experimental section of a paper or in the "special\_details" fields of the CIF. checkCIF was carefully designed to identify outliers and unusual parameters, but every test has its limitations and alerts that are not important in a particular case may appear. Conversely, the absence of alerts does not guarantee there are no aspects of the results needing attention. It is up to the individual to critically assess their own results and, if necessary, seek expert advice.

### **Publication of your CIF in IUCr journals**

A basic structural check has been run on your CIF. These basic checks will be run on all CIFs submitted for publication in IUCr journals (*Acta Crystallographica*, *Journal of Applied Crystallography*, *Journal of Synchrotron Radiation*); however, if you intend to submit to *Acta Crystallographica Section C* or *E* or *IUCrData*, you should make sure that full publication checks are run on the final version of your CIF prior to submission.

### **Publication of your CIF in other journals**

Please refer to the *Notes for Authors* of the relevant journal for any special instructions relating to CIF submission.

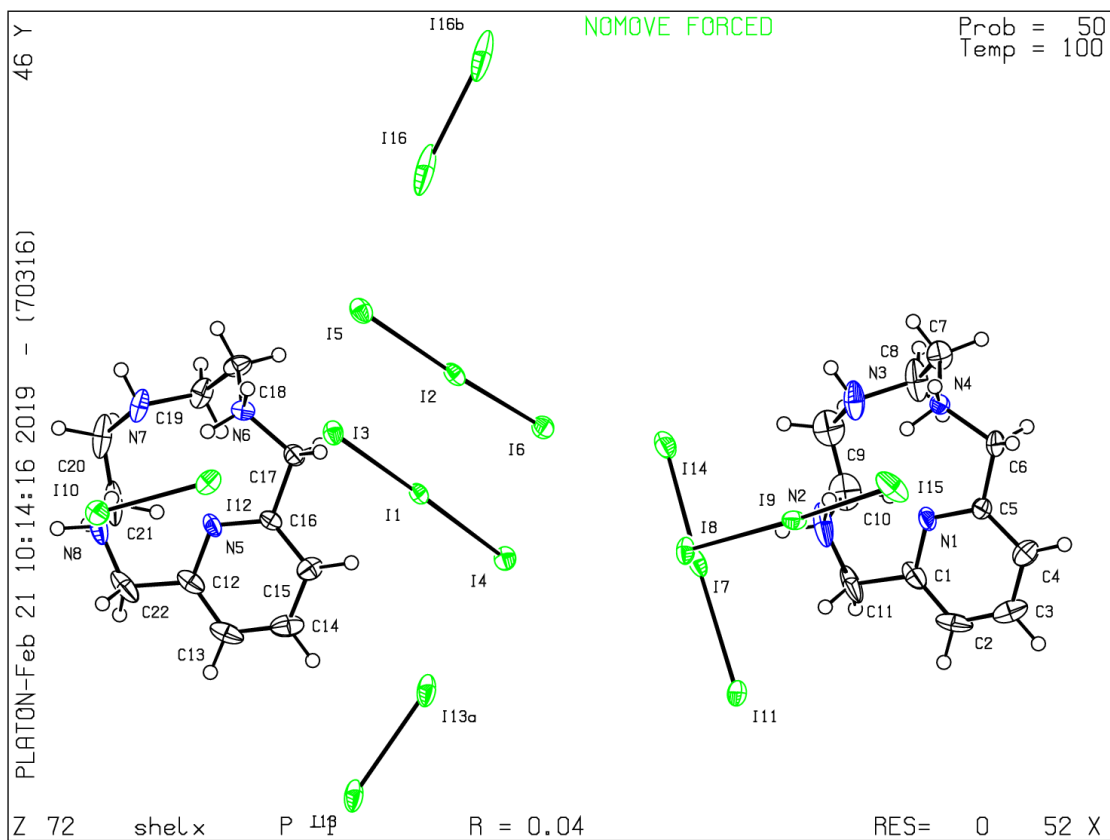

Supplement: s1 [file s1]
