# Supplementary material
Source: MDPI journal article supplement (https://www.mdpi.com/2304-6740/7/4/48)

# checkCIF/PLATON report

Structure factors have been supplied for datablock(s) shelx

THIS REPORT IS FOR GUIDANCE ONLY. IF USED AS PART OF A REVIEW PROCEDURE FOR PUBLICATION, IT SHOULD NOT REPLACE THE EXPERTISE OF AN EXPERIENCED CRYSTALLOGRAPHIC REFEREE.

No syntax errors found.      CIF dictionary      Interpreting this report

## Datablock: shelx

---

Bond precision:    C-C = 0.0340 Å                      Wavelength=0.71073

Cell:                      a=9.226(1)              b=13.060(1)              c=17.377(2)  
                            alpha=90              beta=104.671(3)              gamma=90  
Temperature:              100 K

|                | Calculated                  | Reported         |
|----------------|-----------------------------|------------------|
| Volume         | 2025.5(4)                   | 2025.5(4)        |
| Space group    | P 21/m                      | P 21/m           |
| Hall group     | -P 2yb                      | -P 2yb           |
| Moiety formula | I7, C14 H26 N4 O, I3, 2(I2) | ?                |
| Sum formula    | C14 H26 I14 N4 O            | C14 H23 I14 N4 O |
| Mr             | 2042.99                     | 2039.96          |
| Dx, g cm-3     | 3.350                       | 3.345            |
| Z              | 2                           | 2                |
| Mu (mm-1)      | 10.714                      | 10.714           |
| F000           | 1776.0                      | 1770.0           |
| F000'          | 1763.57                     |                  |
| h,k,lmax       | 10,15,20                    | 10,15,20         |
| Nref           | 3733                        | 2810             |
| Tmin,Tmax      | 0.088,0.117                 | 0.337,0.746      |
| Tmin'          | 0.035                       |                  |

Correction method= # Reported T Limits: Tmin=0.337 Tmax=0.746  
AbsCorr = MULTI-SCAN

Data completeness= 0.753                      Theta(max)= 25.022

R(reflections)= 0.0779( 2244)              wR2(reflections)= 0.2353( 2810)

S = 1.090                      Npar= 187

---

**test-name\_ALERT\_alert-type\_alert-level.**  
Click on the hyperlinks for more details of the test.

PLAT434\_ALERT\_2\_A Short Inter HL..HL Contact I8 ..I9 3.23 Ang.  
x,y,z = 1.555 Check

PLAT434\_ALERT\_2\_A Short Inter HL..HL Contact I8 ..I9 3.23 Ang.  
x,1/2-y,z = 4.565 Check

|                   |                                      |            |       |              |
|-------------------|--------------------------------------|------------|-------|--------------|
| PLAT029_ALERT_3_B | _diffrn_measured_fraction_theta_full | value Low  | 0.954 | Why?         |
| PLAT342_ALERT_3_B | Low Bond Precision on C-C Bonds      |            | 0.034 | Ang.         |
| PLAT420_ALERT_2_B | D-H Without Acceptor                 | O1 --H1    |       | Please Check |
| PLAT434_ALERT_2_B | Short Inter HL..HL Contact           | I3 ..I10   | 3.46  | Ang.         |
|                   |                                      | -1+x,y,z = | 1_455 | Check        |

PLAT434\_ALERT\_2\_B Short Inter HL..HL Contact I3 ..I10 3.46 Ang.  
-1+x,3/2-y,z = 4.475 Check

PLAT434\_ALERT\_2\_B Short Inter HL..HL Contact I3            ..I10'            3.49 Ang.  
-1+x,y,z =            1\_455 Check

PLAT434\_ALERT\_2\_B Short Inter HL..HL Contact I3 ..I10' 3.49 Ang.  
-1+x,3/2-y,z = 4.475 Check

**Author Response: these are long intramolecular distances featuring the I7-polyiodides or short I...I secondary bonds. All these distances are discussed in the manuscript**

---

**Alert level C**

|                   |                                                  |                |              |
|-------------------|--------------------------------------------------|----------------|--------------|
| PLAT041_ALERT_1_C | Calc. and Reported SumFormula                    | Strings Differ | Please Check |
| PLAT043_ALERT_1_C | Calculated and Reported Mol. Weight              | Differ by ..   | 3.03 Check   |
| PLAT068_ALERT_1_C | Reported F000 Differs from Calcd (or Missing)... |                | Please Check |
| PLAT234_ALERT_4_C | Large Hirshfeld Difference N2                    | --C5           | 0.16 Ang.    |
| PLAT242_ALERT_2_C | Low 'MainMol' Ueq as Compared to Neighbors of    | N2             | Check        |

---

**Alert level G**

FORMU01\_ALERT\_2\_G There is a discrepancy between the atom counts in the  
     \_chemical\_formula\_sum and the formula from the \_atom\_site\* data.  
     Atom count from \_chemical\_formula\_sum: C14 H23 I14 N4 O1  
     Atom count from the \_atom\_site data: C14 H27 I14 N4 O1  
 CELLZ01\_ALERT\_1\_G Difference between formula and atom\_site contents detected.  
 CELLZ01\_ALERT\_1\_G ALERT: Large difference may be due to a  
     symmetry error - see SYMMG tests  
     From the CIF: \_cell\_formula\_units\_Z 2  
     From the CIF: \_chemical\_formula\_sum C14 H23 I14 N4 O  
     TEST: Compare cell contents of formula and atom\_site data

| atom | Z*formula | cif sites | diff  |
|------|-----------|-----------|-------|
| C    | 28.00     | 28.00     | 0.00  |
| H    | 46.00     | 54.00     | -8.00 |
| I    | 28.00     | 28.00     | 0.00  |
| N    | 8.00      | 8.00      | 0.00  |
| O    | 2.00      | 2.00      | 0.00  |

|                   |                                                  |       |             |
|-------------------|--------------------------------------------------|-------|-------------|
| PLAT003_ALERT_2_G | Number of Uiso or Uij Restrained non-H Atoms ... | 16    | Report      |
| PLAT004_ALERT_5_G | Polymeric Structure Found with Maximum Dimension | 1     | Info        |
| PLAT007_ALERT_5_G | Number of Unrefined Donor-H Atoms .....          | 2     | Report      |
| PLAT072_ALERT_2_G | SHELXL First Parameter in WGHT Unusually Large   | 0.14  | Report      |
| PLAT083_ALERT_2_G | SHELXL Second Parameter in WGHT Unusually Large  | 31.88 | Why ?       |
| PLAT186_ALERT_4_G | The CIF-Embedded .res File Contains ISOR Records | 2     | Report      |
| PLAT300_ALERT_4_G | Atom Site Occupancy of H1 Constrained at         | 0.5   | Check       |
| PLAT300_ALERT_4_G | Atom Site Occupancy of H8A Constrained at        | 0.5   | Check       |
| PLAT300_ALERT_4_G | Atom Site Occupancy of H8C Constrained at        | 0.5   | Check       |
| PLAT301_ALERT_3_G | Main Residue Disorder .....(Resd 1 )             | 26%   | Note        |
| PLAT302_ALERT_4_G | Anion/Solvent/Minor-Residue Disorder (Resd 4 )   | 50%   | Note        |
| PLAT764_ALERT_4_G | Overcomplete CIF Bond List Detected (Rep/Expd) . | 1.21  | Ratio       |
| PLAT779_ALERT_4_G | Suspect or Irrelevant (Bond) Angle in CIF .... # | 7     | Check       |
|                   | I10 -I3 -I10' 1.455 1.555 1.455                  | 3.80  | Deg.        |
| PLAT779_ALERT_4_G | Suspect or Irrelevant (Bond) Angle in CIF .... # | 11    | Check       |
|                   | I10 -I9 -I10' 1.555 1.555 1.555                  | 4.80  | Deg.        |
| PLAT779_ALERT_4_G | Suspect or Irrelevant (Bond) Angle in CIF .... # | 15    | Check       |
|                   | I5' -I4 -I5 2.547 1.555 2.547                    | 9.80  | Deg.        |
| PLAT780_ALERT_1_G | Coordinates do not Form a Properly Connected Set |       | Please Do ! |
| PLAT802_ALERT_4_G | CIF Input Record(s) with more than 80 Characters | 1     | Info        |
| PLAT860_ALERT_3_G | Number of Least-Squares Restraints .....         | 96    | Note        |
| PLAT870_ALERT_4_G | ALERTS Related to Twinning Effects Suppressed .. |       | ! Info      |

---

- 2 **ALERT level A** = Most likely a serious problem - resolve or explain  
 7 **ALERT level B** = A potentially serious problem, consider carefully  
 5 **ALERT level C** = Check. Ensure it is not caused by an omission or oversight  
 22 **ALERT level G** = General information/check it is not something unexpected

6 ALERT type 1 CIF construction/syntax error, inconsistent or missing data  
12 ALERT type 2 Indicator that the structure model may be wrong or deficient  
4 ALERT type 3 Indicator that the structure quality may be low  
12 ALERT type 4 Improvement, methodology, query or suggestion  
2 ALERT type 5 Informative message, check

---

It is advisable to attempt to resolve as many as possible of the alerts in all categories. Often the minor alerts point to easily fixed oversights, errors and omissions in your CIF or refinement strategy, so attention to these fine details can be worthwhile. In order to resolve some of the more serious problems it may be necessary to carry out additional measurements or structure refinements. However, the purpose of your study may justify the reported deviations and the more serious of these should normally be commented upon in the discussion or experimental section of a paper or in the "special\_details" fields of the CIF. checkCIF was carefully designed to identify outliers and unusual parameters, but every test has its limitations and alerts that are not important in a particular case may appear. Conversely, the absence of alerts does not guarantee there are no aspects of the results needing attention. It is up to the individual to critically assess their own results and, if necessary, seek expert advice.

### **Publication of your CIF in IUCr journals**

A basic structural check has been run on your CIF. These basic checks will be run on all CIFs submitted for publication in IUCr journals (*Acta Crystallographica*, *Journal of Applied Crystallography*, *Journal of Synchrotron Radiation*); however, if you intend to submit to *Acta Crystallographica Section C* or *E* or *IUCrData*, you should make sure that full publication checks are run on the final version of your CIF prior to submission.

### **Publication of your CIF in other journals**

Please refer to the *Notes for Authors* of the relevant journal for any special instructions relating to CIF submission.

---

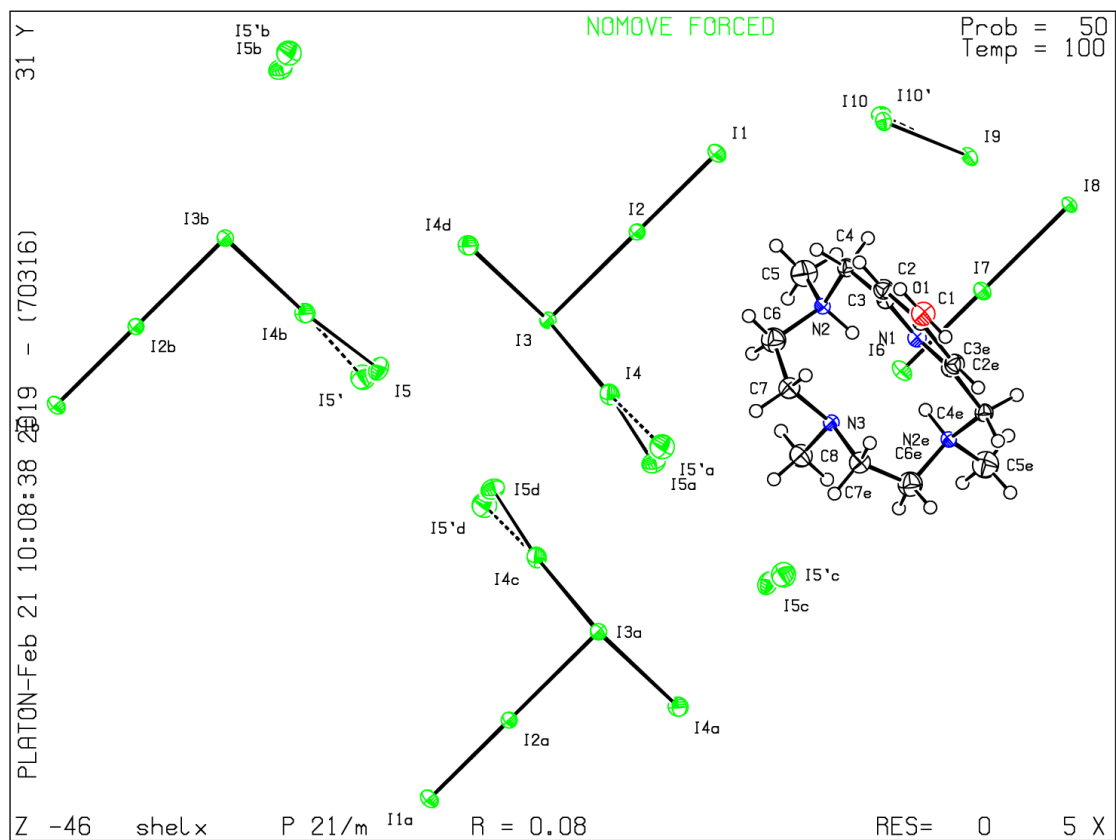

Supplement: s1 [file s1]
