# Supplementary material
Source: MDPI journal article supplement (https://www.mdpi.com/2304-6740/7/4/48)
Supplement: s1 [file s1]

# **Supplementary Materials: Stabilization of Supramolecular Networks of Polyiodides with Protonated Small Tetra-azacyclophanes**

Matteo Savastano, Álvaro Martínez-Camarena, Carla Bazzicalupi,  
Estefanía Delgado-Pinar, José M. Llinares, Palma Mariani, Begoña Verdejo,  
Enrique García-España and Antonio Bianchi

**Table S1** - Hydrogen bonds found in the [(H<sub>2</sub>L1)<sub>2</sub>I<sub>2</sub>(I<sub>5</sub>)(I<sub>3</sub>)<sub>3</sub>] crystal structure

| D-H      | D(D-H) | D(H..A) | <DHA   | D(D...A) | A                     |
|----------|--------|---------|--------|----------|-----------------------|
| N2-H2A   | 0.910  | 3.048   | 128.54 | 3.684    | I9                    |
| N2-H2B   | 0.910  | 3.043   | 134.84 | 3.741    | I7                    |
| N2-H2B   | 0.910  | 2.909   | 133.38 | 3.595    | I8                    |
| N3-H3A   | 0.912  | 3.122   | 128.94 | 3.763    | I9 [-x+1, -y+2, -z+1] |
| N3-H3A   | 0.912  | 3.066   | 139.07 | 3.802    | I15 [x-1, y, z]       |
| N4-H4B   | 0.910  | 2.791   | 154.35 | 3.632    | I8 [-x+1, -y+2, -z+1] |
| N4-H4B   | 0.910  | 3.284   | 111.20 | 3.712    | I15                   |
| N6-H6A   | 0.910  | 3.067   | 120.70 | 3.618    | I5                    |
| N6-H6A   | 0.910  | 2.948   | 126.57 | 3.566    | I11 [x-1, y-1, z]     |
| N7-H7A   | 0.912  | 3.086   | 128.07 | 3.718    | I10 [-x-1, -y, -z]    |
| N7-H7A   | 0.912  | 3.203   | 137.27 | 3.922    | I12 [x-1, y, z]       |
| N8-H8A   | 0.910  | 2.796   | 143.60 | 3.569    | I11 [-x, -y+1, -z]    |
| N8-H8B   | 0.910  | 3.091   | 124.24 | 3.681    | I10                   |
| C8-H8D   | 0.990  | 3.323   | 135.48 | 4.088    | I16 [-x, -y+2, -z+1]  |
| C10-H10A | 0.990  | 3.092   | 155.23 | 4.013    | I16 [x+1, y+1, z]     |
| C19-H19B | 0.990  | 3.288   | 125.07 | 3.941    | I13 [-x, -y+1, -z]    |
| C21-H21B | 0.990  | 3.028   | 162.40 | 3.982    | I13 [x-1, y, z]       |

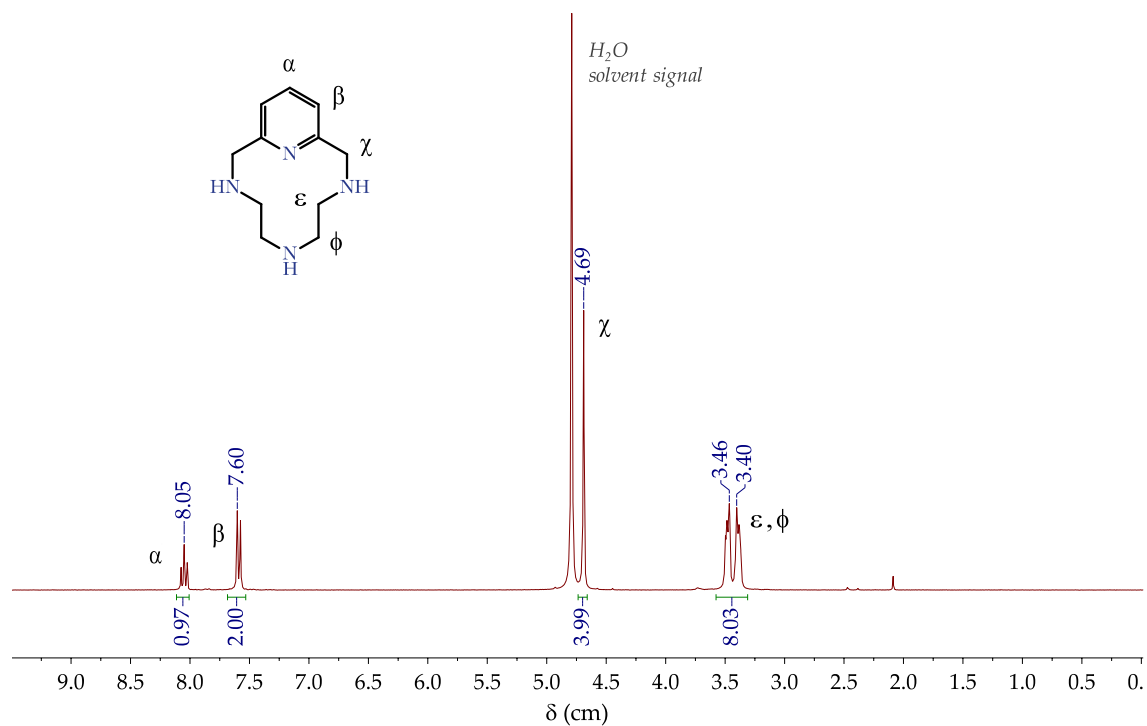

**Figure S1.**  $^1\text{H}$ -NMR spectrum of L1 in  $\text{D}_2\text{O}$  at 298 K.

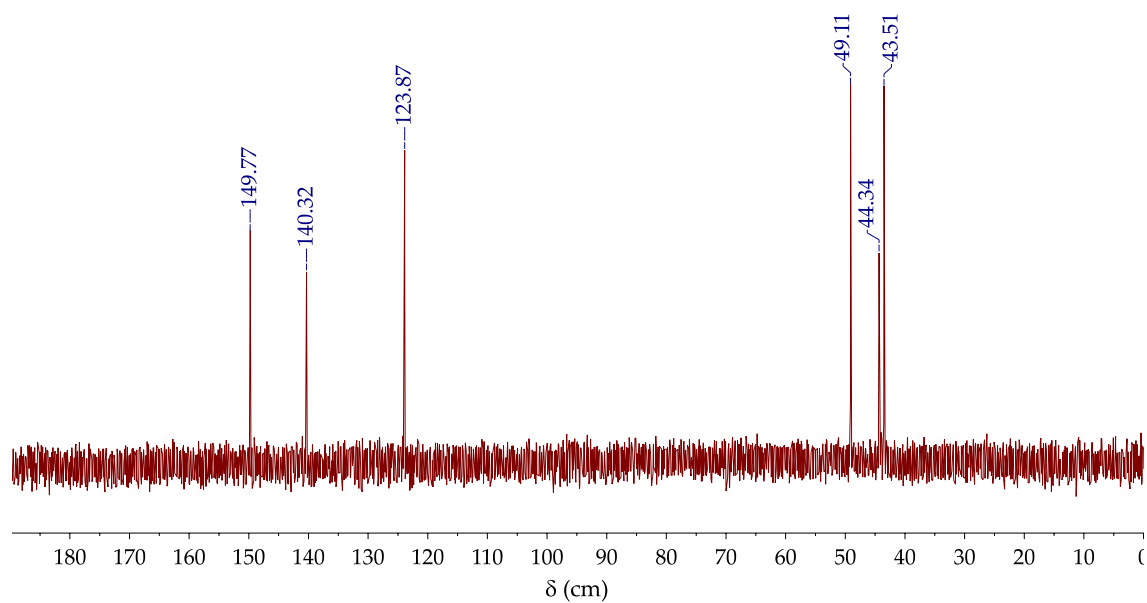

**Figure S2.**  $^{13}\text{C}$ -NMR spectrum of L1 in  $\text{D}_2\text{O}$  at 298 K.

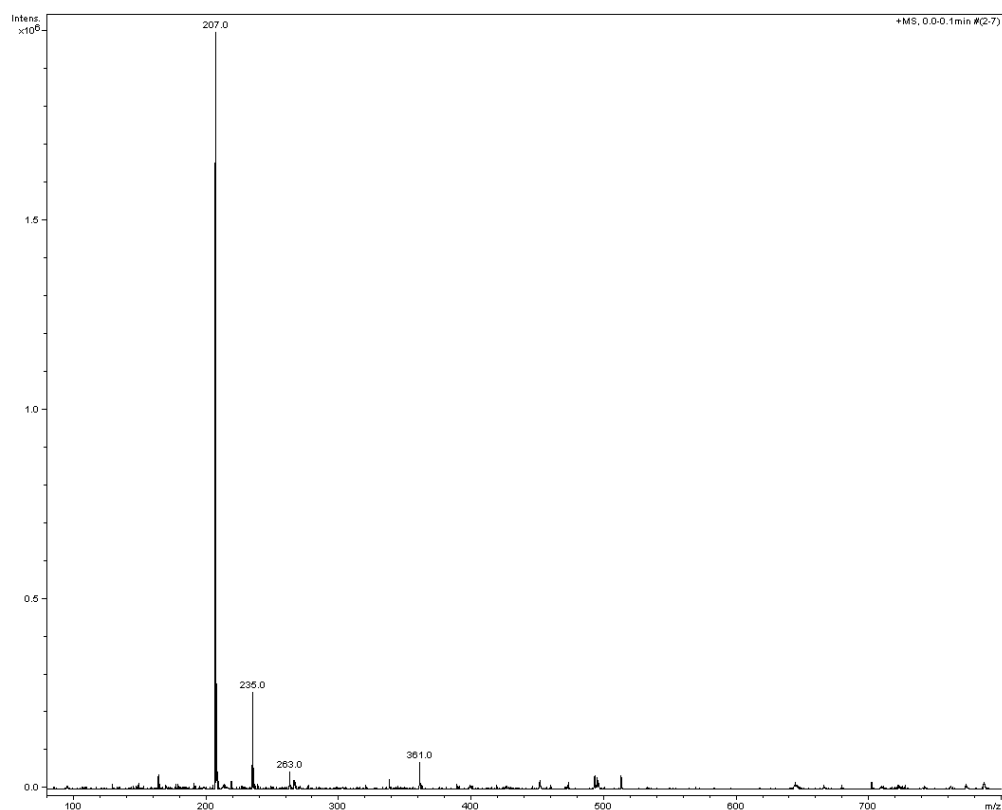

**Figure S3.** LC-MS (ESI/APCI-TOF) of L1 in H<sub>2</sub>O.

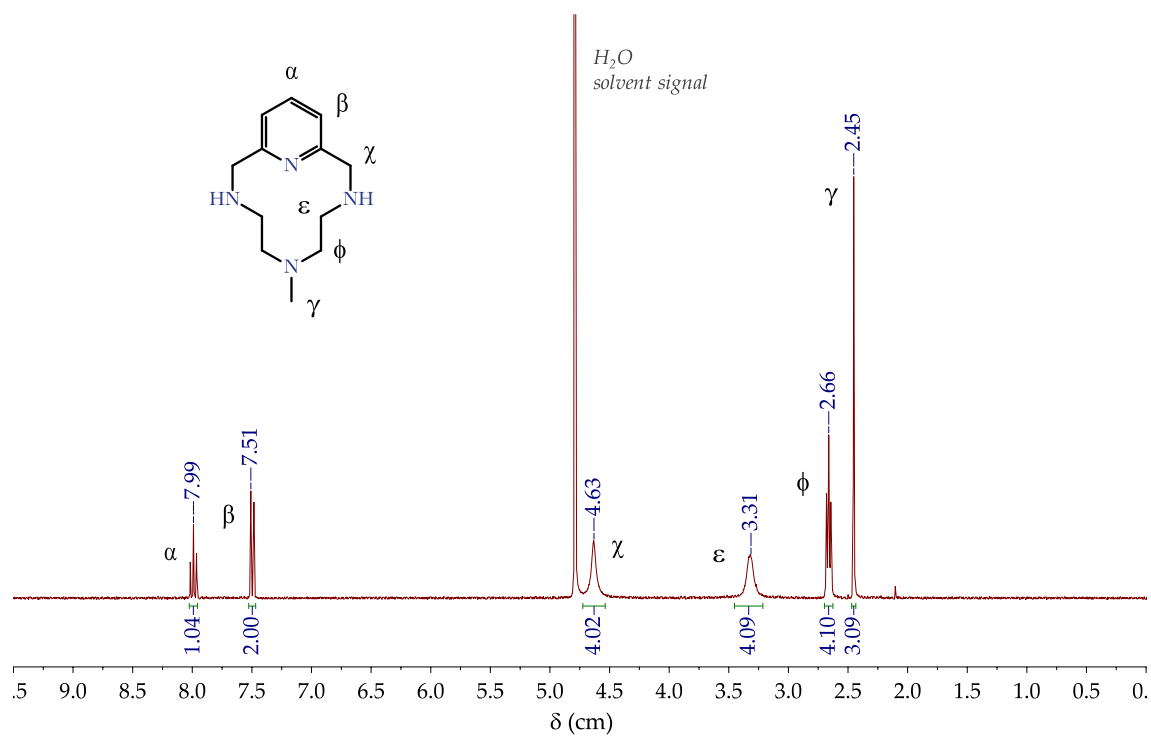

**Figure S4.** <sup>1</sup>H-NMR spectrum of L1-Me in D<sub>2</sub>O at 298 K.

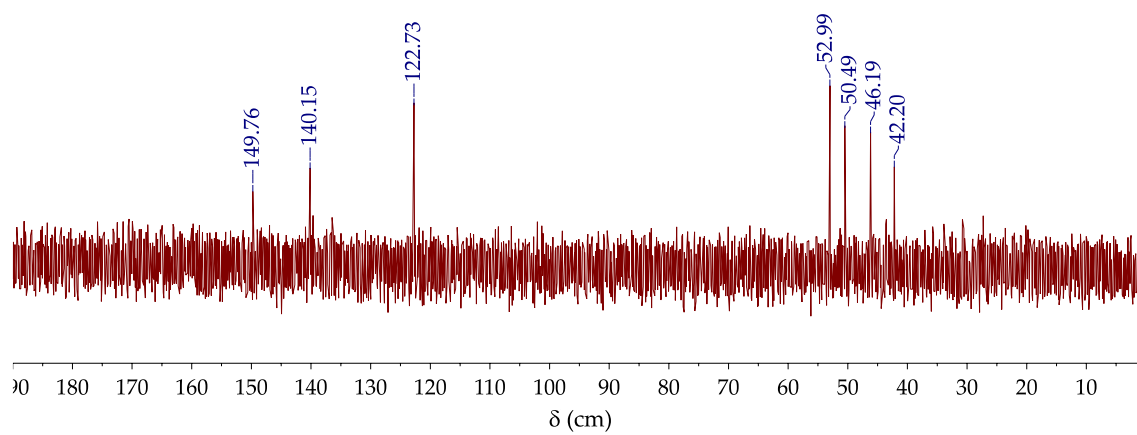

**Figure S5.**  $^{13}\text{C}$ -NMR spectrum of **L1-Me** in  $\text{D}_2\text{O}$  at 298 K.

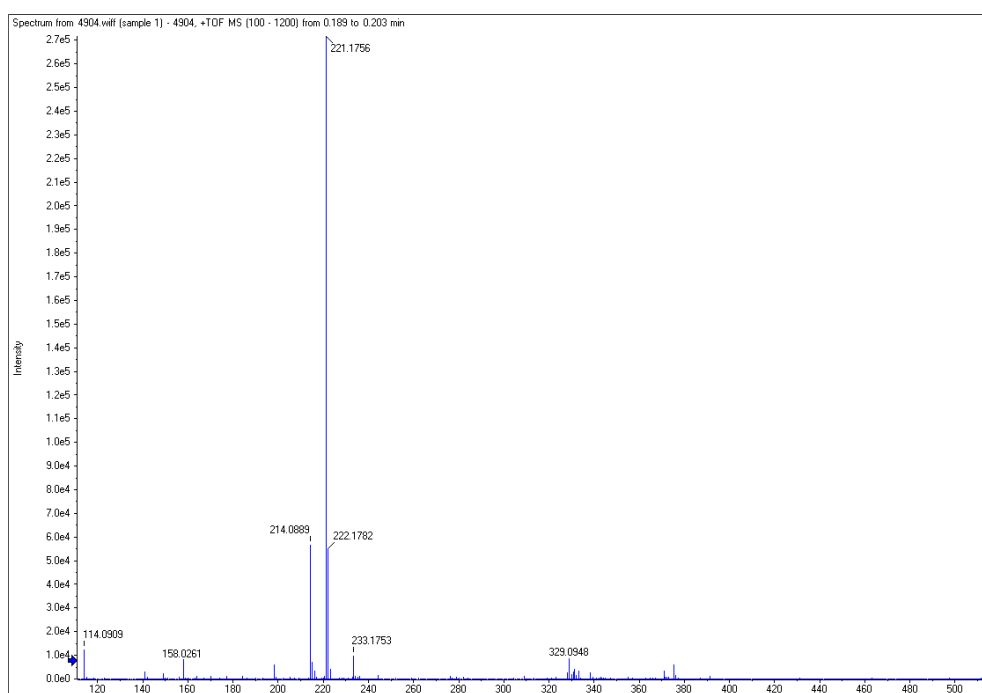

**Figure S6.** LC-MS (ESI/APCI-TOF) of **L1-Me** in  $\text{D}_2\text{O}$ .

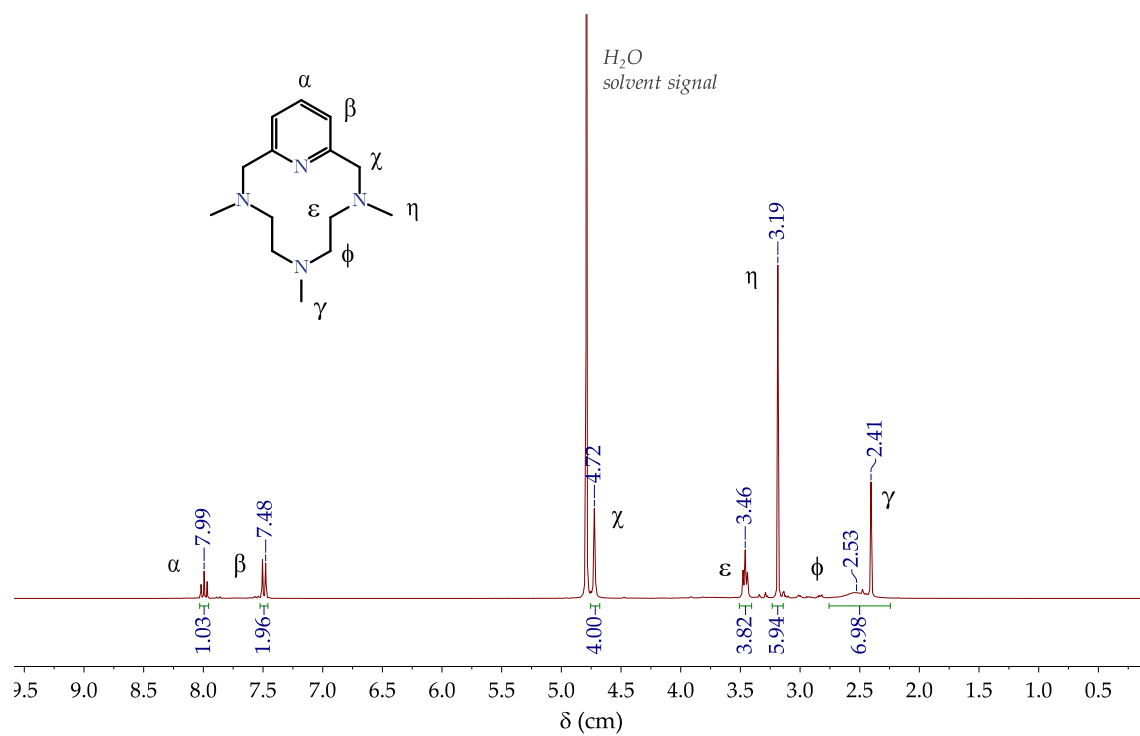

Figure S7.  $^1\text{H}$ -NMR spectrum of  $\text{L1-Me}_3$  in  $\text{D}_2\text{O}$  at 298 K.

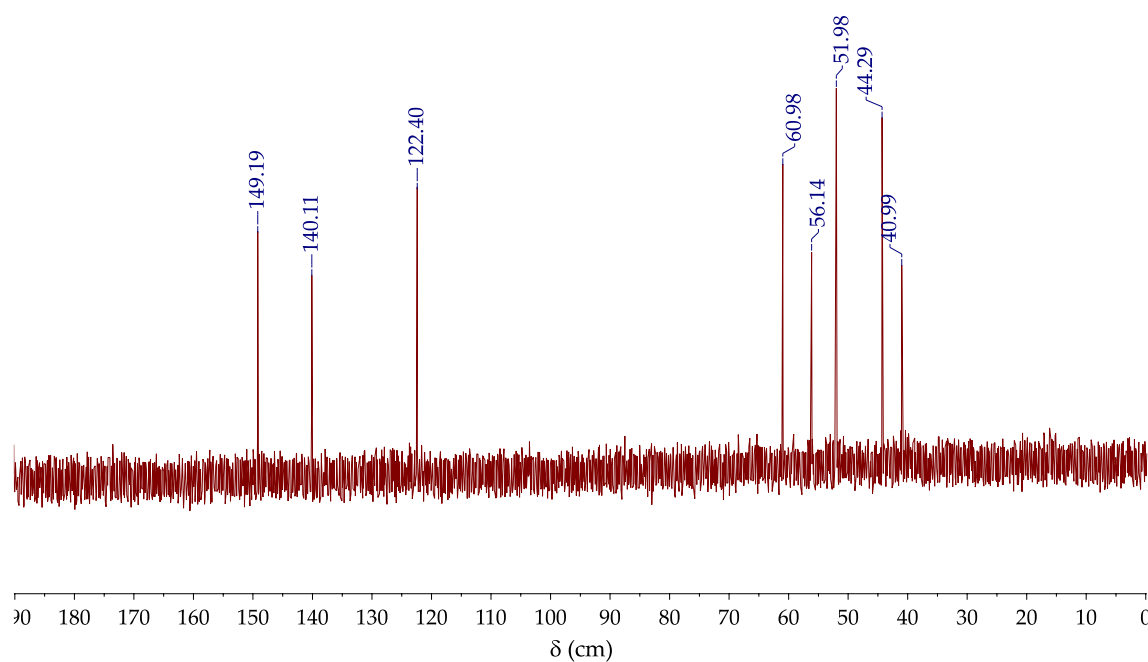

Figure S8.  $^{13}\text{C}$ -NMR spectrum of  $\text{L1-Me}_3$  in  $\text{D}_2\text{O}$  at 298 K.

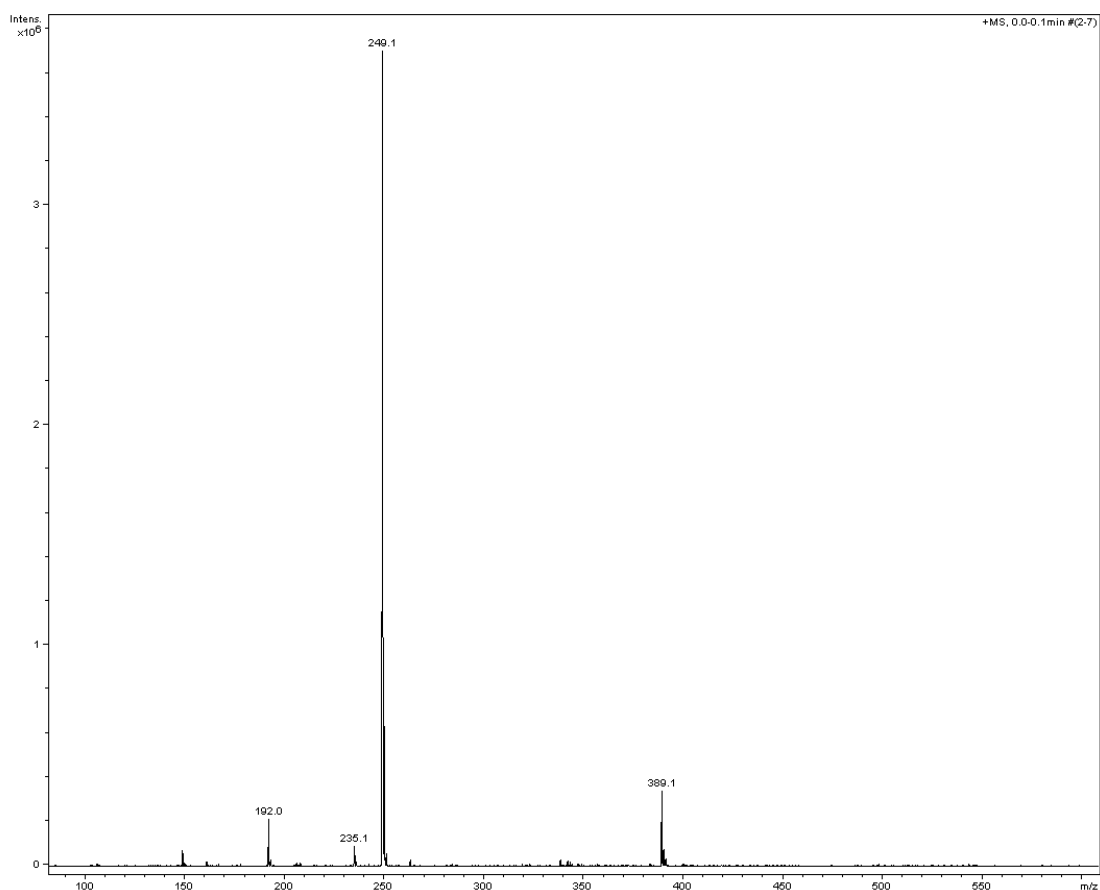

Figure S9. LC-MS (ESI/APCI-TOF) of L1-Me<sub>3</sub> in D<sub>2</sub>O.

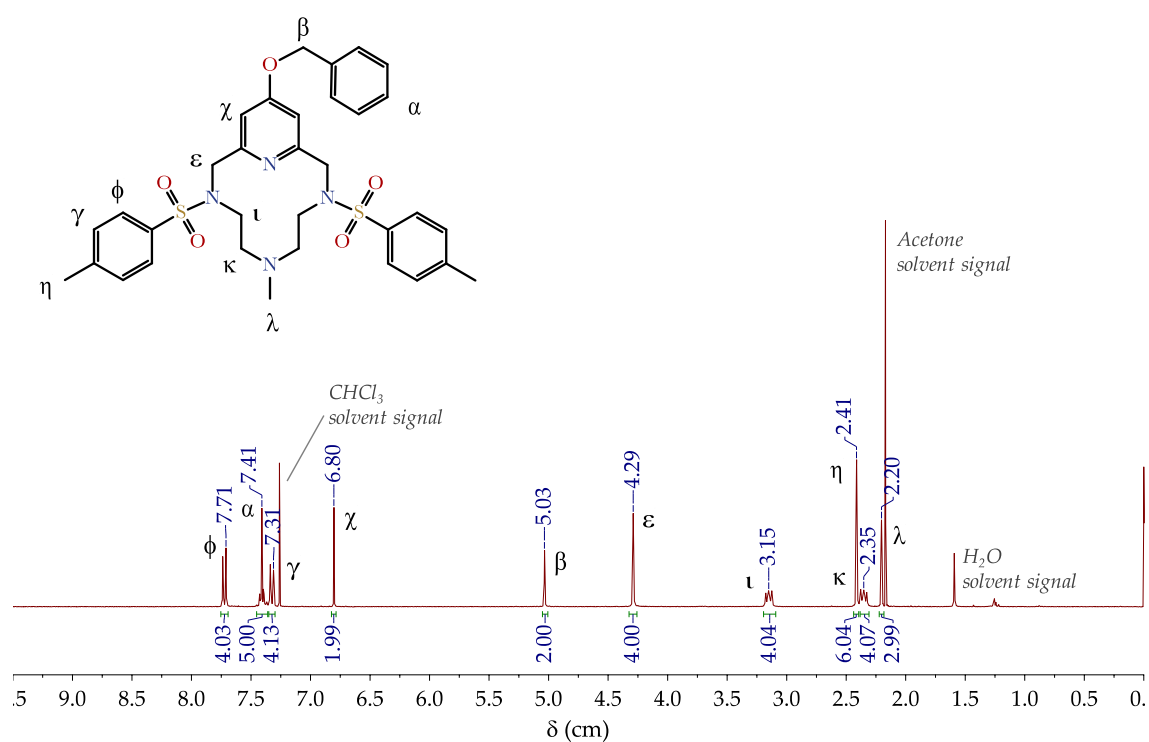

Figure S10. <sup>1</sup>H-NMR spectrum of **3** in CDCl<sub>3</sub> at 298 K.

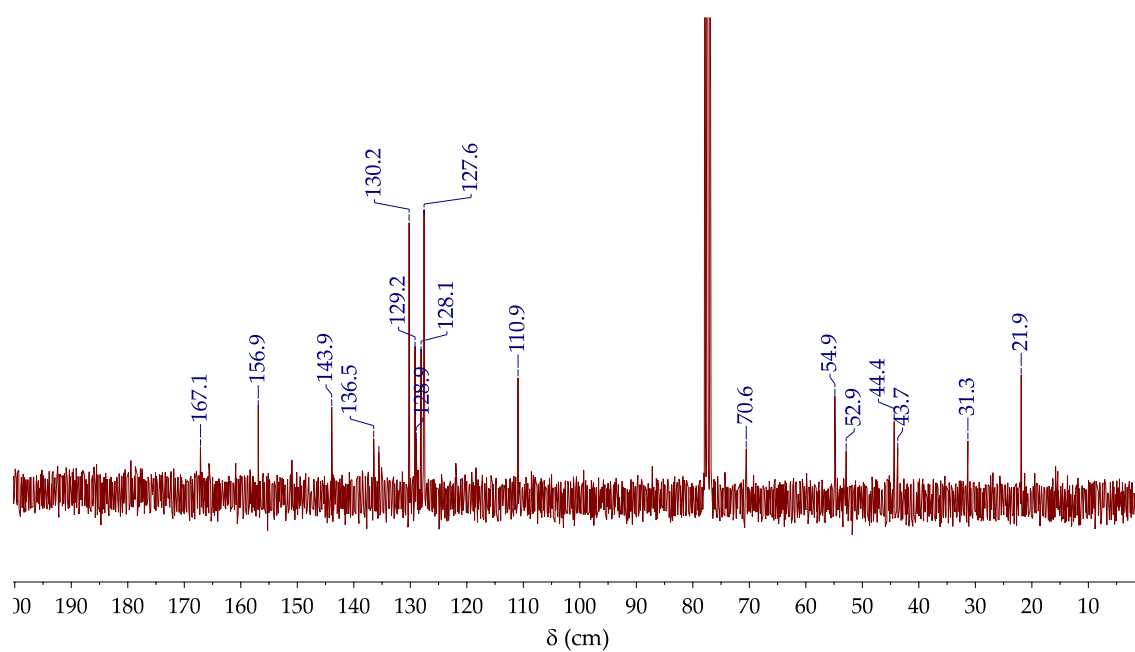

**Figure S11.** <sup>13</sup>C-NMR spectrum of **3** in CDCl<sub>3</sub> at 298 K.

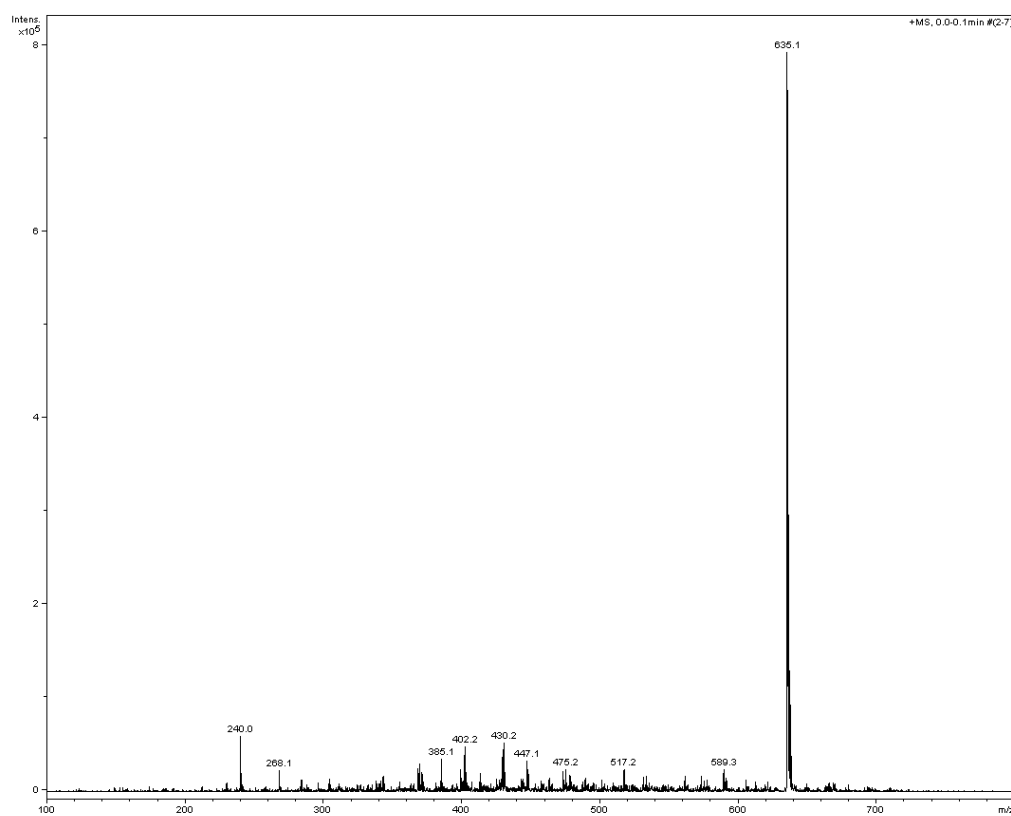

**Figure S12.** LC-MS (ESI/APCI-TOF) of **3** in CHCl<sub>3</sub>.



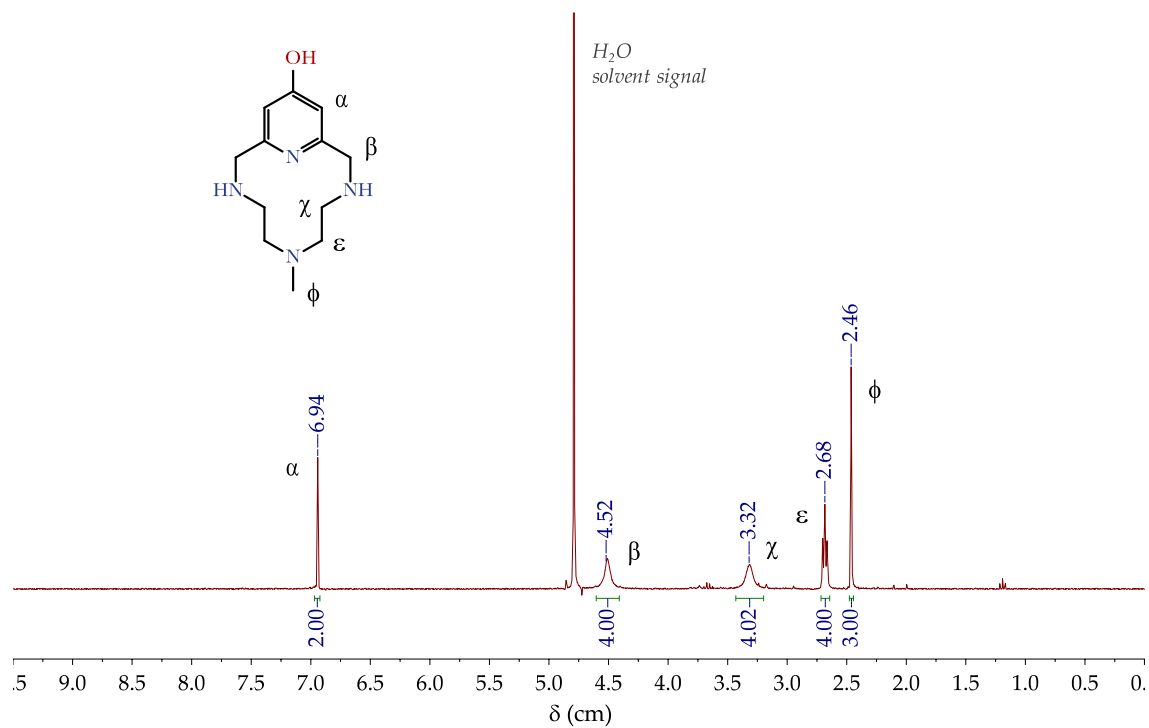

Figure S13. <sup>1</sup>H-NMR spectrum of 4 in D<sub>2</sub>O at 298 K.

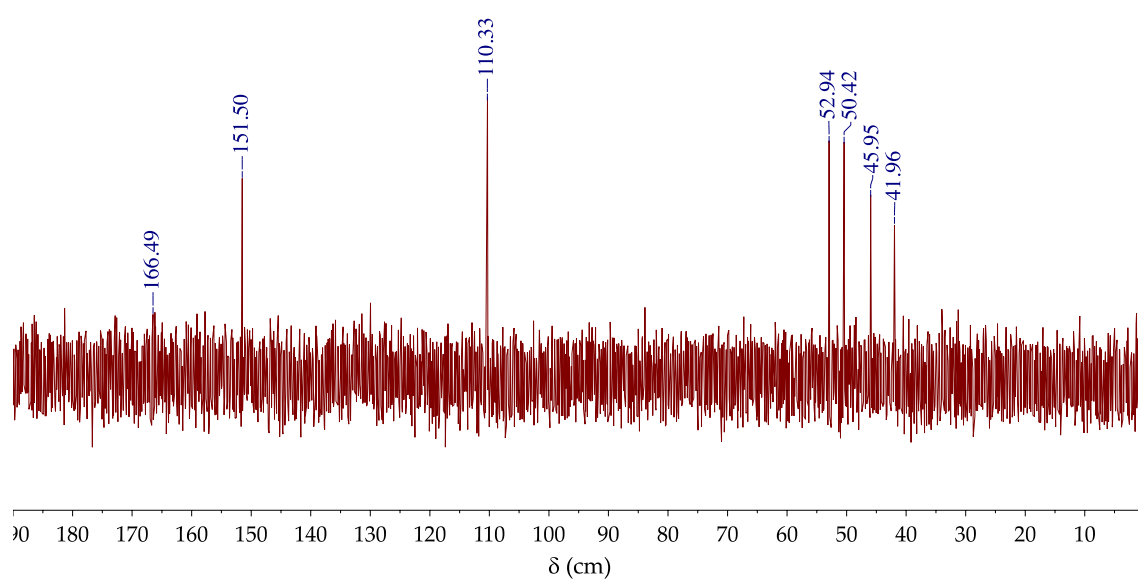

Figure S14. <sup>13</sup>C-NMR spectrum of 4 in D<sub>2</sub>O at 298 K.

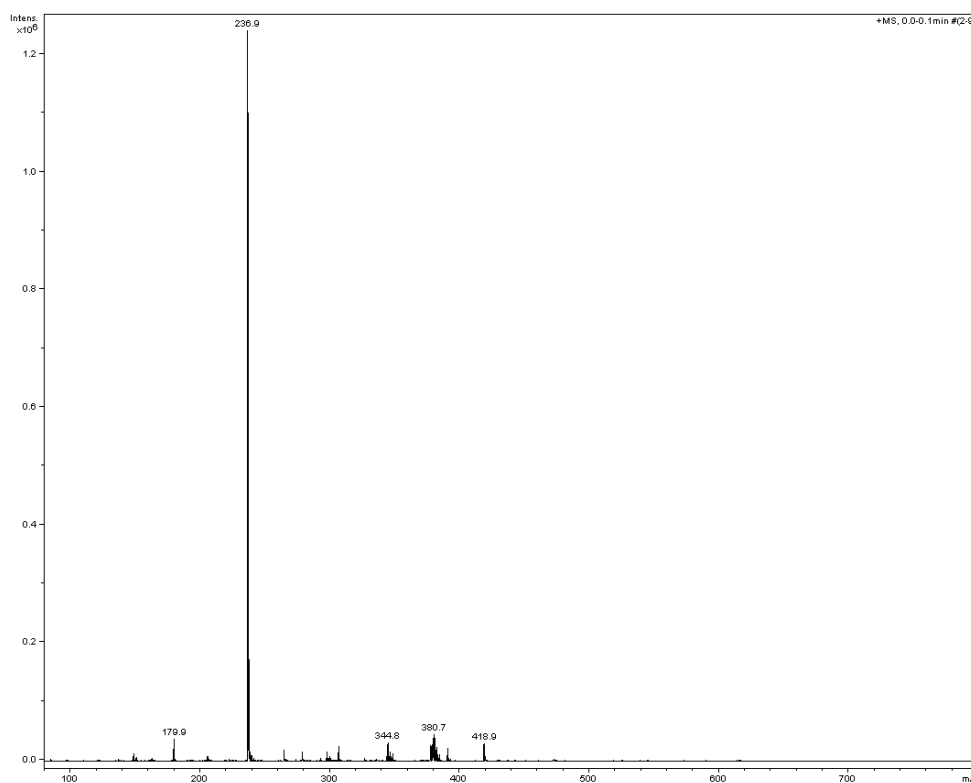

**Figure S15.** LC-MS (ESI/APCI-TOF) of **4** in CHCl<sub>3</sub>.

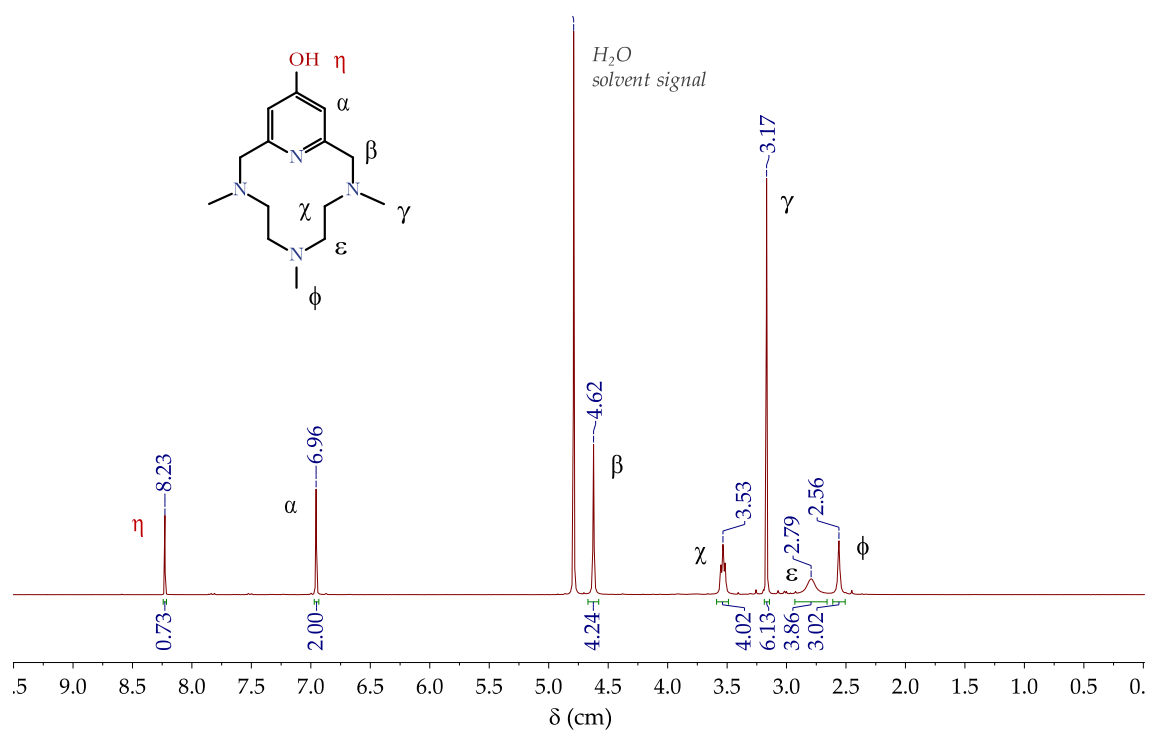

**Figure S16.** <sup>1</sup>H-NMR spectrum of **L2** in D<sub>2</sub>O at 298 K.

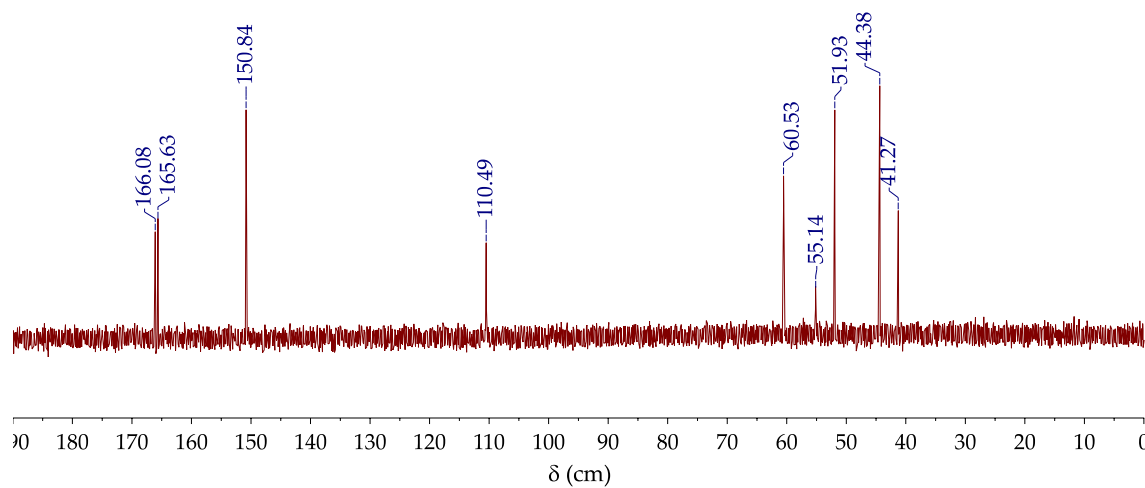

**Figure S17.**  $^{13}\text{C}$ -NMR spectrum of **L2** in  $\text{D}_2\text{O}$  at 298 K.

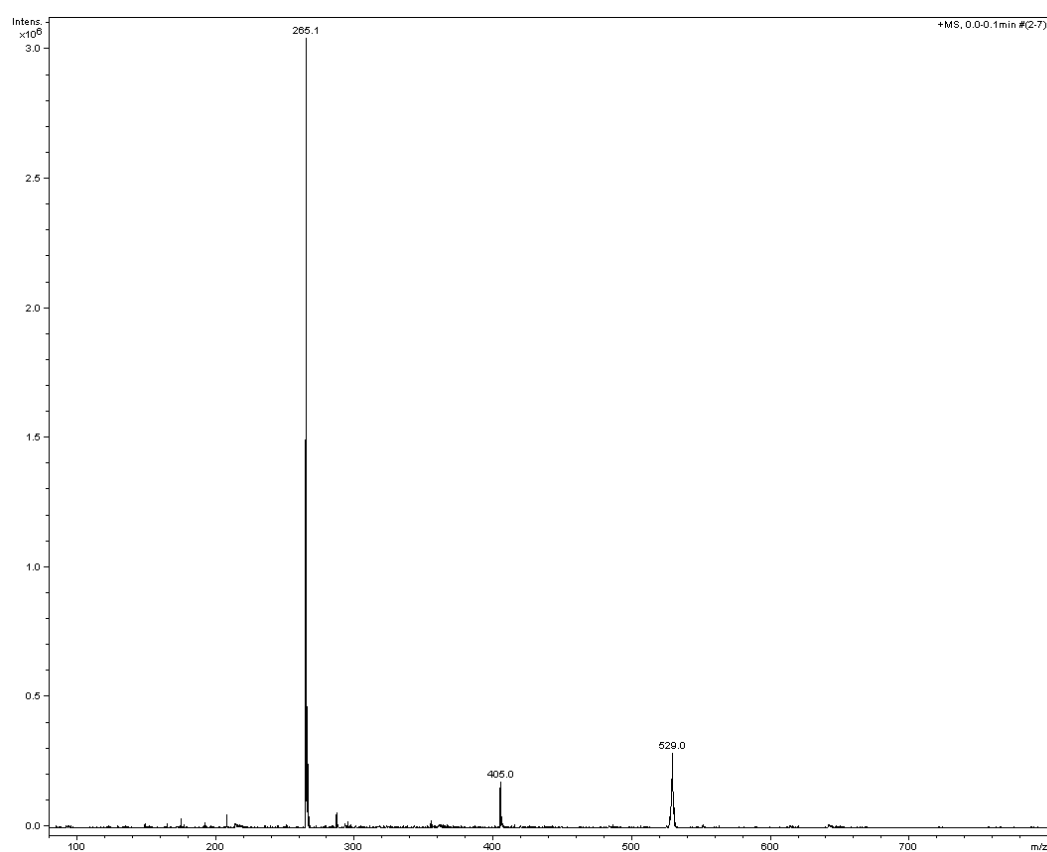

**Figure S18.** LC-MS (ESI/APCI-TOF) of **L2** in  $\text{CHCl}_3$ .
